# Supplementary material for: Chemistry, taxonomy and ecology of the potentially chimpanzee-dispersed Vepris teva sp.nov. (Rutaceae) endangered in coastal thicket in the Congo Republic
Source: PeerJ. 2022 Aug 23;10:e13926. doi: 10.7717/peerj.13926 (PMC9415428; doi:10.7717/peerj.13926)
Supplement: Supplemental Information 2 — These data are the basis of the morphological description. [file peerj-10-13926-s002.xlsx]

## Sheet: Sheet1
Vepris teva
Specimens		1	2	3	4	5	6	7	8	9	10	11	12	13	14	15	16	17
Median length (cm)	Leaf 1	10.4	4.5	na	7.8	7	na	5.9	7.1	7.3	7.7	8	14.3	8.5	10.3	7.1	7.5	10.6
	Leaf 2	na	4.7	6.3	7.7	9.5	7.4	5.7	5.6	7.1	7.5	7.6	na	7.9	na	5.5	8.45	10
	Leaf 3	na	na	6.3	8	8.1	6.7	7.3	na	5.5	na	6.7	na	6.4	na	7.6	8	7.4
Median breadth (cm)	Leaf 1	3.45	2	2.5	3.2	3.45	na	2.2	2.7	2.8	2.5	3.5	5.2	2.8	4.4	2.3	3.05	4.2
	Leaf 2	na	2.7	3.1	3.5	2.72	2.2	2.3	2.7	3.2	na	2.5	2na	2.5	na	2.2	3.3	3.8
	Leaf 3	na	na	2.2	3.35	2.9	2.9	2.7	na	2.25	na	3	na	2.45	na	2.8	3.3	2.5
Lateral length (cm)	Leaf 1	8.4	5	4.7	7	7.35	na	5.3	5.1	5.5	6.3	6.95	12.7	7.6	8.4	6.2	7	10
	Leaf 2	na	na	6.6	5.5	8.2	6.8	6	5.1	5.1	6.3	6.6	na	6.5	na	5.3	7.6	8.7
	Leaf 3	na	na	5.9	6.8	6.6	6	7	na	5	3.5	57	na	5.4	na	6.6	8	6.6
Lateral breadth (cm)	Leaf 1	3.2	2.4	2.2	2.9	3.4	na	1.9	2.3	2.35	2.1	3.1	4.25	2.4	3.8	2.25	3.25	4.2
	Leaf 2	na	na	2.6	2.4	3	2.7	2.3	2.2	2.9	2.05	3	na	2.2	na	1.8	3.1	3.7
	Leaf 3	na	na	2.2	2.1	2.5	2.3	2.6	na	2.15	1.95	2.9	na	1.8	na	2.4	3.6	2.65
No. 2" nerves on one side midrib	Median 1	15	na	13	15	15	16	12	14	11	14	13	18	16	14	16	13	18
	Median 2	na	10	12	14	14	11	15	11	14	16	13	na	15	na	13	16	16
	Median 3	na	11	12	11	16	na	16	na	13	16	12	na	13	na	17	14	16
Median acumen length (cm)	Leaf 1	0.9	0.45	0.7	0.5	0.8	na	0.5	0.45	0.5	0.85	0.4	1	1	1	0.75	0.8	0.9
	Leaf 2	na	0.5	0.7	0.5	0.9	0.4	0.3	0.4	0.45	0.7	0.7	na	0.8	na	0.6	0.75	1
	Leaf 3	na	na	0.5	0.5	0.45	0.4	0.4	na	0.4	na	0.35	na	0.35	na	0.95	0.7	1
Median acumen breadth (cm)	Leaf 1	4	3	2.5	3.5	3.5	na	2.5	2.5	2.5	3.5	4.5	3.5	4	4.5	2.5	3	na
	Leaf 2	na	3	3	3.5	4	2.5	2.5	3	2.5	3	4.5	na	3.5	na	2.5	2.5	3.5
	Leaf 3	na	na	2.5	3.5	3.5	2.5	0.5	na	2.2	na	3.5	na	4.5	na	2.5	3.5	2.5
Petiolule length (cm)	Leaf 1	1.45	0.3	0.4	0.5	0.8	na	0.7	0.8	0.6	0.5	0.9	1.6	0.5	0.9	0.3	0.6	1.1
	Leaf 2	na	0.3	0.3	1	0.9	0.75	0.6	0.4	0.75	0.4	0.5	na	0.75	na	0.4	0.9	1
	Leaf 3	na	na	0.5	0.8	1.3	0.8	1	na	0.45	na	0.6	na	0.5	na	0.45	0.7	0.8
Petiole length (cm)	Leaf 1	0.2	0.15	1.6	0.3	0.2	0.15	0.3	0.3	0.2	1.6	0.25	4	0.4	0.4	1.3	1	2.8
	Leaf 2	0.25	0.2	0.5	0.2	0.2	0.15	0.5	0.3	0.3	4.4	0.5	5	0.75	na	1	1.8	1.9
	Leaf 3	na	na	0.7	0.15	0.8	0.2	0.7	na	0.2	na	0.3	na	0.4	na	0.85	2	2
Inflorescence length (cm)	1	na	0.5	0.5	0.7	0.6	0.7	0.7	0.4	0.6	na	na	na	na	na	na	0	na
Inflorescence length (cm)	2	na	na	0.7	0.8	0.5	0	0.7	0.4	0.75	na	na	na	na	na	na	na	na
Inflorescence length (cm)	3	na	na	0.7	0.4	0.4	0.5	0.7	0.55	0.85	na	na	na	na	na	na	na	na
Stem diameter at lowest leafy node (mm)	Stem 1	3	3.5	3	3	3	2	3	1.5	3	2.5	3.5	2.5	3	2.5	3.5	3.5	4
	Stem 2	na	2.5	2	3.5	na	na	na	na	2	na	na	na	2.5	na	na	na	na
	Stem 3	na	na	3	na	na	na	na	na	na	na	na	na	2	na	na	na	na
Lenticel (length x breadth) (mm)	Lenticel 1	0.7x0.38	0.75x0.5	0.28x0.25	0.72x0.45	0.4x0.28	0.48x0.38	0.63x0.43	0.75x0.33	0.5x0.45	0.63x0.625	1.25x0.5	1x0.3	1x0.33	0.35x0.33	1.3x0.65	0.75x0.38	1x0.5
	Lenticel 2	0.75x0.5	0.68x0.63	0.3x0.2	0.4x0.28	0.55x0.35	0.38x0.2	0.63x0.25	0.88x0.25	0.63x0.5	1.13x0.625	0.75x0.25	0.88x0.38	0.63x0.25	0.63x0.25	1.75x0.63	1x0.5	0.75x0.63
	Lenticel 3	0.63x0.3	0.75x0.58	0.4x0.3	0.75x0.48	0.65x0.23	na	0.68x0.3	0.88x0.45	0.35x0.23	1.5x0.38	1.63x0.38	0.53x0.5	0.88x0.5	0.43x0.43	2.25x0.88	0.63x0.5	1.13x0.38
Internodes (cm)	Internode 1	7.1	3.3	2.8	1.3	7.2	6.1	5	4.8	1.6	1.7	1.9	2.8	1.1	2.6	2.8	1.7	1.2
	Internode 2	1.8	0.2	1.5	2.5	1.8	1.5	7.5	1.6	3.7	3.4	5.3	3.3	1	5.8	3	3.5	3.3
	Internode 3	2.7	0.2	3.6	1.9	2.3	3.7	3.2	5.3	2.85	1	0.9	1.9	4	1.8	1.3	0	1.5
Ripe fruit lxb (mm)	Fruit 1	14x13	na	na	na	na	na	na	na	na	14x19	na	na	na	13x12	na	na	na
	Fruit 2	12x11	na	na	na	na	na	na	na	na	na	na	na	na	11x11	na	na	na
	Fruit 3	na	na	na	na	na	na	na	na	na	na	na	na	na	12.5x12	na	na	na
Pedicel fruit length (mm)	Fruit 1	na	na	na	na	na	na	na	na	na	0	na	na	na	1.5	na	na	na
	Fruit 2	3	na	na	na	na	na	na	na	na	na	na	na	na	0	na	na	na
	Fruit 3	na	na	na	na	na	na	na	na	na	na	na	na	na	1.5	na	na	na
Diameter (mm)	Dot 1	0.15	0.175	0.175	0.175	0.15	0.163	0.15	0.15	0.15	0.15	0.125	0.15	0.15	0.15	0.125	0.175	0.2
	Dot 2	na	na	na	na	na	na	na	na	na	0.175	0.125	0.225	0.175	0.15	0.15	0.225	0.175
	Dot 3	na	na	na	na	na	na	na	na	na	0.15	0.15	0.2	0.175	0.225	0.1	0.125	0.225
Density (dots/mm2)	Dot 1	4	3	3	4	7	5	6	4	4	4	4	5	5	4	4	6	6
	Dot 2	na	na	na	na	na	na	na	na	na	6	4	4	5	4	3	5	5
	Dot 3	na	na	na	na	na	na	na	na	na	7	3	5	2	2	4	6	8
Specimens:	1. Mpandzou 1198 sheet 1/2(K)
	2. Mpandzou 1198 sheet 2/2(K)
	3. Kami 1356 Sheet 1/1 (K)
	4. Kami 1227 Sheet 1/6 (K)
	5. Kami 1227 Sheet 2/6 (K)
	6. Kami 1227 Sheet 3/6 (K)
	7. Kami 1227 Sheet 4/6 (K)
	8. Kami 1227 Sheet 5/6 (K)
	9. Kami 1227 Sheet 6/6 (K)
	10. Mpandzou 1768 Sheet1/1(K)
	11. Mpandzou 1641 Sheet1/1(K)
	12. Mpandzou 1653 Sheet1/1(K)
	13. Mpandzou 1754 Sheet1/1(K)
	14. Kami 1437 Sheet 1/1 (K)
	15. Kami 1421 Sheet 1/3 (K)
	16. Kami 1421 Sheet 2/3 (K)
	17. Kami 1421 Sheet 3/3 (K)
	Full specimen citations are given in the main paper
